# Supplementary material for: Developing a medication communication framework across continuums of care using the Circle of Care Modeling approach
Source: PubMed Central journal article supplement (PMC3853098; doi:10.1186/1472-6963-13-418), 2013-10-17
Supplement: 1472-6963-13-418-S1.pdf [file 1472-6963-13-418-S1.pdf]

# Supplementary Materials

## Taxonomy of Medication Communication Activities

Nicole A. Kitson, PhD, Morgan Price, MD, PhD, Francis Lau, Grey Showler, RN, BSN  
 Developing a medication communication framework across continuums of care using the Circle of Care Modeling approach, BMC Health Services Research, 2013.

### Communicate - DETERMINE NEED

|                               |                                                                                                                                                                                                                                                                                                                                                                                                                                                                                |
|-------------------------------|--------------------------------------------------------------------------------------------------------------------------------------------------------------------------------------------------------------------------------------------------------------------------------------------------------------------------------------------------------------------------------------------------------------------------------------------------------------------------------|
| Discuss complaint             | <ul style="list-style-type: none"> <li>• Describe symptoms</li> <li>• Discuss condition</li> <li>• Review history</li> <li>• Discuss personal information</li> <li>• Provide advocacy</li> <li>• Give history</li> </ul>                                                                                                                                                                                                                                                       |
| Discuss social context        | <ul style="list-style-type: none"> <li>• Finances</li> <li>• Housing</li> <li>• Social history</li> </ul>                                                                                                                                                                                                                                                                                                                                                                      |
| Discuss non-medicinal options |                                                                                                                                                                                                                                                                                                                                                                                                                                                                                |
| Discuss medicinal options     |                                                                                                                                                                                                                                                                                                                                                                                                                                                                                |
| Discuss plans and goals       | <ul style="list-style-type: none"> <li>• Discuss health goals</li> <li>• Discuss patient needs</li> <li>• Set expectations</li> <li>• Build a problem list</li> <li>• Create, discuss, review, revise plans               <ul style="list-style-type: none"> <li>○ Shared care</li> <li>○ Patient care</li> <li>○ Self-monitoring plan</li> <li>○ Discharge plan</li> <li>○ Medication plan</li> </ul> </li> <li>• Discuss attachment to Family Physician or clinic</li> </ul> |
| Educate                       | <ul style="list-style-type: none"> <li>• Share medication experience</li> <li>• Encourage best practice               <ul style="list-style-type: none"> <li>○ See same doctor or go to same clinic</li> <li>○ Fill at one pharmacy</li> <li>○ Return unused medication</li> <li>○ Do not share medications with friends</li> </ul> </li> <li>• Interpret scientific report or medication information from Internet</li> </ul>                                                 |

**Communicate - PRESCRIBE**

|                                                  |                                                                                                                                                                                                                                                                                                                           |
|--------------------------------------------------|---------------------------------------------------------------------------------------------------------------------------------------------------------------------------------------------------------------------------------------------------------------------------------------------------------------------------|
| Confirm patient identity                         |                                                                                                                                                                                                                                                                                                                           |
| Provide medication information                   | <ul style="list-style-type: none"><li>• Dose, frequency, route, timing</li><li>• Name of medication</li><li>• Benefits and risks</li><li>• Side effects</li></ul>                                                                                                                                                         |
| Request, prepare, confirm, alert prescription    | <ul style="list-style-type: none"><li>• New prescription</li><li>• Modified prescription<ul style="list-style-type: none"><li>○ Change medication</li><li>○ Discontinue medication</li><li>○ Hold medication</li><li>○ Stop, cancel medication</li><li>○ Adjust dosage</li></ul></li><li>• Renewal prescription</li></ul> |
| Request, confirm emergency supply of medications |                                                                                                                                                                                                                                                                                                                           |
| Review coverage                                  | <ul style="list-style-type: none"><li>• Discuss medication coverage</li><li>• Request, confirm, alert special authority</li></ul>                                                                                                                                                                                         |
| Request, discuss restrictions                    | <ul style="list-style-type: none"><li>• Frequency of pickups</li><li>• No early refills</li><li>• No refills for lost prescriptions</li><li>• Limit to one pharmacy</li><li>• Medication type and quantity</li></ul>                                                                                                      |
| Review prescribing alerts                        | <ul style="list-style-type: none"><li>• Drug-to-drug interactions</li><li>• Allergies</li><li>• Duplication therapy</li><li>• Dosing errors</li><li>• Contraindications</li></ul>                                                                                                                                         |

**Communicate - DISPENSE**

|                                             |                                                                                                                                                                                                                                                                                                                                                                                                                                                                                                                                                                                                                                                                                                                                  |
|---------------------------------------------|----------------------------------------------------------------------------------------------------------------------------------------------------------------------------------------------------------------------------------------------------------------------------------------------------------------------------------------------------------------------------------------------------------------------------------------------------------------------------------------------------------------------------------------------------------------------------------------------------------------------------------------------------------------------------------------------------------------------------------|
| Confirm patient identity                    |                                                                                                                                                                                                                                                                                                                                                                                                                                                                                                                                                                                                                                                                                                                                  |
| Provide medication information              | <ul style="list-style-type: none"> <li>• Dose, frequency, route, timing</li> <li>• Name of medication</li> <li>• Benefits and risks</li> <li>• Side effects</li> </ul>                                                                                                                                                                                                                                                                                                                                                                                                                                                                                                                                                           |
| Confirm medication availability             |                                                                                                                                                                                                                                                                                                                                                                                                                                                                                                                                                                                                                                                                                                                                  |
| Request, prepare, confirm, alert dispensing | <ul style="list-style-type: none"> <li>• New prescription</li> <li>• Modified prescription               <ul style="list-style-type: none"> <li>○ Change medication</li> <li>○ Discontinue medication</li> <li>○ Hold medication</li> <li>○ Stop, cancel medication</li> <li>○ Adjust dosage</li> </ul> </li> <li>• Renewal prescription               <ul style="list-style-type: none"> <li>○ Alert refills remaining</li> </ul> </li> <li>• Confirm packaging</li> <li>• Confirm, modify dispensing schedule</li> <li>• Request, confirm status of dispensing</li> <li>• Request, provide harm reduction supplies</li> <li>• Provide patient medication delivery info</li> <li>• Redirect patient to care provider</li> </ul> |
| Review coverage                             | <ul style="list-style-type: none"> <li>• Discuss medication coverage</li> <li>• Request, confirm, alert special authority</li> <li>• Request, confirm insurance information</li> <li>• Schedule medication payment</li> <li>• Discuss cost of medication</li> <li>• Discuss dispensing fees</li> <li>• Discuss ability to pay</li> <li>• Alert medication not covered</li> </ul>                                                                                                                                                                                                                                                                                                                                                 |
| Request, discuss restrictions               | <ul style="list-style-type: none"> <li>• Frequency of pickups</li> <li>• No early refills</li> <li>• No refills for lost prescriptions</li> <li>• Limit to one pharmacy</li> <li>• Medication type and quantity</li> </ul>                                                                                                                                                                                                                                                                                                                                                                                                                                                                                                       |
| Review, notify dispensing alerts            | <ul style="list-style-type: none"> <li>• Drug-to-drug interactions</li> <li>• Allergies</li> <li>• Duplication therapy</li> <li>• Dosing errors</li> <li>• Contraindications</li> </ul>                                                                                                                                                                                                                                                                                                                                                                                                                                                                                                                                          |

**Communicate – ADMINISTER**

|                                                      |                                                                                                                                                                                                                                                                                                                                                |
|------------------------------------------------------|------------------------------------------------------------------------------------------------------------------------------------------------------------------------------------------------------------------------------------------------------------------------------------------------------------------------------------------------|
| Provide medication administration instructions       | <ul style="list-style-type: none"> <li>• Initial instructions               <ul style="list-style-type: none"> <li>○ Timing</li> </ul> </li> <li>• Revised instructions               <ul style="list-style-type: none"> <li>○ Change timing of medication</li> <li>○ Titration</li> </ul> </li> <li>• Confirm/clarify instructions</li> </ul> |
| Schedule medication administration                   |                                                                                                                                                                                                                                                                                                                                                |
| Request, prepare, modify, clarify Delegation of Task |                                                                                                                                                                                                                                                                                                                                                |

**Communicate – MONITOR/EVALUATE**

|                                                     |                                                                                                                                                                                                                                                                     |
|-----------------------------------------------------|---------------------------------------------------------------------------------------------------------------------------------------------------------------------------------------------------------------------------------------------------------------------|
| Confirm, request, review current medication details | <p>Name, dose, route, dispensing schedule, prescribers, dispensers, frequency</p> <ul style="list-style-type: none"> <li>• Community</li> <li>• Hospital</li> <li>• Samples</li> <li>• Over-the-counter</li> </ul>                                                  |
| Confirm, request, review past medication details    |                                                                                                                                                                                                                                                                     |
| Discuss medication compliance                       | <ul style="list-style-type: none"> <li>• Current compliance</li> <li>• Past compliance</li> </ul>                                                                                                                                                                   |
| Request, provide, confirm allergy information       |                                                                                                                                                                                                                                                                     |
| Discuss experience of side effects                  |                                                                                                                                                                                                                                                                     |
| Review medication efficacy                          |                                                                                                                                                                                                                                                                     |
| Request, confirm appointment                        | <ul style="list-style-type: none"> <li>• Doctor</li> <li>• Hospital</li> <li>• Specialist</li> </ul>                                                                                                                                                                |
| Request, order, review tests                        | <ul style="list-style-type: none"> <li>• Request lab tests, bloodwork order</li> <li>• Order lab tests, bloodwork, UDS</li> <li>• Discuss, communicate lab results, values</li> <li>• Confirm reason for lab order</li> <li>• Discuss bloodwork schedule</li> </ul> |
| Review self-monitoring                              | <ul style="list-style-type: none"> <li>• Instructions</li> <li>• Report results</li> <li>• Request, confirm, deny share medications</li> <li>• Review symptoms (e.g., of low blood sugar)</li> </ul>                                                                |
| Confirm, request, review care transitions           | <ul style="list-style-type: none"> <li>• Request, provide report</li> <li>• Notify patient admitted to/discharged from hospital</li> <li>• Confirm provider details</li> <li>• Confirm dispenser details</li> <li>• Request follow-up with patient</li> </ul>       |

**COORDINATE Communication**

|                                                    |                                                                                                                                        |
|----------------------------------------------------|----------------------------------------------------------------------------------------------------------------------------------------|
| Request, confirm appointments/referrals            | <ul style="list-style-type: none"><li>• Prescription</li><li>• Lab test, bloodwork</li><li>• Specialist</li><li>• Doctor</li></ul>     |
| Request, transmit patient information              | <ul style="list-style-type: none"><li>• Current medical records</li><li>• Historical medical records</li><li>• Release forms</li></ul> |
| Relay messages between patients and care providers |                                                                                                                                        |
| Request, confirm, alert coverage                   | <ul style="list-style-type: none"><li>• Includes Special Authority</li></ul>                                                           |
