# Supplementary material for: Developing a medication communication framework across continuums of care using the Circle of Care Modeling approach
Source: PubMed Central journal article supplement (PMC3853098; doi:10.1186/1472-6963-13-418), 2013-10-17
Supplement: 1472-6963-13-418-S2.pdf [file 1472-6963-13-418-S2.pdf]

## **Supplementary Materials**

### **Medication Communication Activities – Roles and Pathways**

Nicole A. Kitson, PhD, Morgan Price, MD, PhD, Francis Lau, Grey Showler, RN, BSN  
Developing a medication communication framework across continuums of care using the Circle of Care Modeling approach, BMC Health Services Research, 2013.

#### **Medication Communication Activity Tables:**

- Combined activities
- Determine Need
- Prescribe
- Dispense
- Administer
- Monitor/evaluate
- Coordinate







**Medication Communication Activity - Communicate DISPENSE: Roles and Pathways. Represents 36 pathways between 14 roles.** Light blue boxes represent one connection (e.g., Patient --> Medical Office Assistant); whereas, dark blue boxes represent two connections within roles (e.g., communication between two (or more) Medical Office Assistants within the same clinic).

|                                                | Patient | Family physician | Specialist physician | Walk-in clinic doctor | Pharmacist | Pharmacy technician | Pharmacy delivery | Pharmacist (other pharmacy) | Pharmacy technician (other pharmacy) | Home and Community Care Nurse | Emergency Room doctor/Physician on duty | Hospital ward doctor | Hospital ward nurse | Pharmicare |           |
|------------------------------------------------|---------|------------------|----------------------|-----------------------|------------|---------------------|-------------------|-----------------------------|--------------------------------------|-------------------------------|-----------------------------------------|----------------------|---------------------|------------|-----------|
| <b>Patient</b>                                 |         |                  |                      |                       |            |                     |                   |                             |                                      |                               |                                         |                      |                     |            | 5         |
| <b>Family physician</b>                        |         |                  |                      |                       |            |                     |                   |                             |                                      |                               |                                         |                      |                     |            | 3         |
| <b>Specialist physician</b>                    |         |                  |                      |                       |            |                     |                   |                             |                                      |                               |                                         |                      |                     |            | 1         |
| <b>Walk-in clinic doctor</b>                   |         |                  |                      |                       |            |                     |                   |                             |                                      |                               |                                         |                      |                     |            | 1         |
| <b>Pharmacist</b>                              |         |                  |                      |                       |            |                     |                   |                             |                                      |                               |                                         |                      |                     |            | 11        |
| <b>Pharmacy technician</b>                     |         |                  |                      |                       |            |                     |                   |                             |                                      |                               |                                         |                      |                     |            | 5         |
| <b>Pharmacy delivery</b>                       |         |                  |                      |                       |            |                     |                   |                             |                                      |                               |                                         |                      |                     |            | 2         |
| <b>Pharmacist (other pharmacy)</b>             |         |                  |                      |                       |            |                     |                   |                             |                                      |                               |                                         |                      |                     |            | 1         |
| <b>Pharmacy technician (other pharmacy)</b>    |         |                  |                      |                       |            |                     |                   |                             |                                      |                               |                                         |                      |                     |            | 1         |
| <b>Home and Community Care Nurse</b>           |         |                  |                      |                       |            |                     |                   |                             |                                      |                               |                                         |                      |                     |            | 1         |
| <b>Emergency Room doctor/Physician on duty</b> |         |                  |                      |                       |            |                     |                   |                             |                                      |                               |                                         |                      |                     |            | 1         |
| <b>Hospital ward doctor</b>                    |         |                  |                      |                       |            |                     |                   |                             |                                      |                               |                                         |                      |                     |            | 1         |
| <b>Hospital ward nurse</b>                     |         |                  |                      |                       |            |                     |                   |                             |                                      |                               |                                         |                      |                     |            | 1         |
| <b>Pharmicare</b>                              |         |                  |                      |                       |            |                     |                   |                             |                                      |                               |                                         |                      |                     |            | 2         |
|                                                | 5       | 3                | 1                    | 1                     | 11         | 5                   | 2                 | 1                           | 1                                    | 1                             | 1                                       | 1                    | 1                   | 2          | <b>36</b> |





| <b>Medication Communication Activity - COORDINATE Communication: Roles and Pathways. Represents 36 pathways between 15 roles.</b> Light blue boxes represent one connection (e.g., Patient --> Medical Office Assistant); whereas, dark blue boxes represent two connections within roles (e.g., communication between two (or more) Medical Office Assistants within the same clinic). | Patient | Family physician | Specialist physician | Walk-in clinic doctor | Previous provider | Pharmacist | Medical Office Assistant | Walk-in clinic Medical Office Assistant | Specialist Medical Office Assistant | Previous Provider Medical Office Assistant | Family member | Home and Community Care Nurse | Community Health Centre Nurse | Home laboratory services | Payor |           |
|-----------------------------------------------------------------------------------------------------------------------------------------------------------------------------------------------------------------------------------------------------------------------------------------------------------------------------------------------------------------------------------------|---------|------------------|----------------------|-----------------------|-------------------|------------|--------------------------|-----------------------------------------|-------------------------------------|--------------------------------------------|---------------|-------------------------------|-------------------------------|--------------------------|-------|-----------|
| <b>Patient</b>                                                                                                                                                                                                                                                                                                                                                                          | 1       |                  |                      |                       |                   |            |                          |                                         |                                     |                                            |               |                               |                               |                          |       | <b>3</b>  |
| <b>Family physician</b>                                                                                                                                                                                                                                                                                                                                                                 |         | 1                |                      |                       |                   |            |                          |                                         |                                     |                                            |               |                               |                               |                          |       | <b>1</b>  |
| <b>Specialist physician</b>                                                                                                                                                                                                                                                                                                                                                             |         |                  | 1                    |                       |                   |            |                          | 1                                       |                                     |                                            |               |                               |                               |                          |       | <b>1</b>  |
| <b>Walk-in clinic doctor</b>                                                                                                                                                                                                                                                                                                                                                            |         |                  |                      | 1                     |                   |            |                          |                                         |                                     |                                            |               |                               |                               |                          |       | <b>1</b>  |
| <b>Previous provider</b>                                                                                                                                                                                                                                                                                                                                                                |         |                  |                      |                       | 1                 |            |                          |                                         |                                     | 1                                          |               |                               |                               |                          |       | <b>1</b>  |
| <b>Pharmacist</b>                                                                                                                                                                                                                                                                                                                                                                       |         |                  |                      |                       |                   | 1          |                          |                                         |                                     |                                            |               |                               |                               |                          |       | <b>1</b>  |
| <b>Medical Office Assistant</b>                                                                                                                                                                                                                                                                                                                                                         | 1       | 1                |                      |                       |                   | 1          | 2                        | 1                                       | 1                                   | 1                                          | 1             | 1                             | 1                             | 1                        | 1     | <b>13</b> |
| <b>Walk-in clinic Medical Office Assistant</b>                                                                                                                                                                                                                                                                                                                                          | 1       |                  |                      | 1                     |                   |            | 1                        |                                         |                                     |                                            |               |                               |                               |                          |       | <b>3</b>  |
| <b>Specialist Medical Office Assistant</b>                                                                                                                                                                                                                                                                                                                                              | 1       |                  | 1                    |                       |                   |            | 1                        |                                         |                                     |                                            | 1             |                               |                               |                          |       | <b>4</b>  |
| <b>Previous provider Medical Office Assistant</b>                                                                                                                                                                                                                                                                                                                                       |         |                  |                      | 1                     |                   |            | 1                        |                                         |                                     |                                            |               |                               |                               |                          |       | <b>2</b>  |
| <b>Family member</b>                                                                                                                                                                                                                                                                                                                                                                    |         |                  |                      |                       |                   |            |                          | 1                                       |                                     |                                            |               |                               |                               |                          |       | <b>2</b>  |
| <b>Home and Community Care Nurse</b>                                                                                                                                                                                                                                                                                                                                                    |         |                  |                      |                       |                   |            | 1                        |                                         |                                     |                                            |               |                               |                               |                          |       | <b>1</b>  |
| <b>Community Health Centre Nurse</b>                                                                                                                                                                                                                                                                                                                                                    |         |                  |                      |                       |                   |            | 1                        |                                         |                                     |                                            |               |                               |                               |                          |       | <b>1</b>  |
| <b>Home laboratory services</b>                                                                                                                                                                                                                                                                                                                                                         |         |                  |                      |                       |                   |            | 1                        |                                         |                                     |                                            |               |                               |                               |                          |       | <b>1</b>  |
| <b>Payor</b>                                                                                                                                                                                                                                                                                                                                                                            |         |                  |                      |                       |                   |            | 1                        |                                         |                                     |                                            |               |                               |                               |                          |       | <b>1</b>  |
|                                                                                                                                                                                                                                                                                                                                                                                         |         |                  |                      |                       |                   |            | 1                        |                                         |                                     |                                            |               |                               |                               |                          |       | <b>36</b> |
